# Supplementary material for: Carboxyfullerene decorated titanium dioxide nanomaterials for reactive oxygen species scavenging activities
Source: Royal Society of Chemistry journal article supplement (doi:10.1039/c6ra09414g), 2016-01-01
Supplement: c6ra09414g1.pdf [file c6ra09414g1.pdf]

## Supporting Information

# Carboxyfullerene decorated titanium dioxide nanomaterials for reactive oxygen species scavenging activities

Kai-Cheng Yang,<sup>a</sup> Jia-Huei Zheng,<sup>b</sup> Yen-Ling Chen,<sup>\*a</sup> Kuen-Chan Lee, <sup>\*c</sup> and Er-

Chieh Cho,<sup>\*b</sup>

<sup>a</sup>Department of Fragrance and Cosmetic Science, Kaohsiung Medical University,  
Kaohsiung, Taiwan

<sup>b</sup>Department of Clinical Pharmacy, School of Pharmacy, College of Pharmacy, Taipei  
Medical University, Taipei 110, Taiwan

<sup>c</sup>Department of Science Education, National Taipei University of Education, Taipei  
106, Taiwan

<sup>a,\*</sup>Corresponding author. E-mail: yelichen@kmu.edu.tw (Y.-L. Chen) Tel: +886-7-

3121101 ext 2584

<sup>b,\*</sup>Corresponding author. E-mail: echo@tmu.edu.tw (E.-C. Cho) Tel: +886-2-

27361661 ext 6179

<sup>c,\*</sup>Corresponding author. E-mail: klee@tea.ntue.edu.tw (K.-C. Lee) Tel: +886-2-

27321104 ext 53461

## Optical Spectra

Figure S1 displays the UV-vis diffuse reflectance spectra of TiO<sub>2</sub> and their composites. It can be seen that all of TiO<sub>2</sub> nanomaterials contained C<sub>70</sub>-COOH increase the light absorbance in the visible light region. In addition, the absorbance effects are higher and higher with the addition amounts of C<sub>70</sub>-COOH in 1% to 10% (w/w). Furthermore, a qualitative red shift to higher wavelength is observed in the edge of both P25 composites and TNR composites due to the electron interactions between TiO<sub>2</sub> and C<sub>70</sub>-COOH [1].

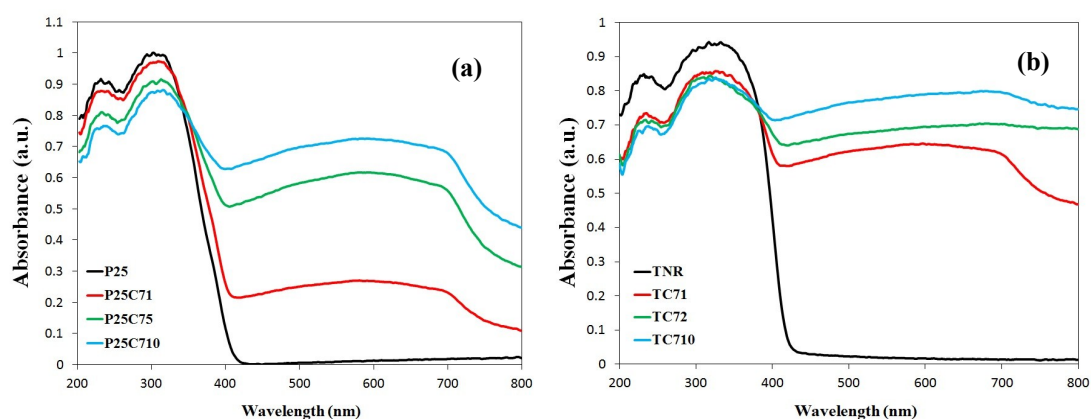

**Figure S1. UV-vis diffuse reflectance spectra of (a) P25 and P25/C<sub>70</sub>-COOH composites (b) TNR and TNR/C<sub>70</sub>-COOH composites.**

## Reference:

- [1] H. Fu, T. Xu, S. Zhu, Y. Zhu, *Environmental science & technology*, 2008, **42**, 8064.
